# Supplementary material for: PKM2 promotes angiotensin‐II‐induced cardiac remodelling by activating TGF‐β/Smad2/3 and Jak2/Stat3 pathways through oxidative stress
Source: PubMed Central journal article supplement (PMC8581335; doi:10.1111/jcmm.17007), 2021-10-23

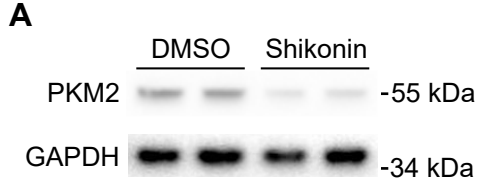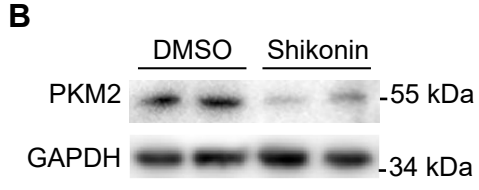

Supplement: JCMM-25-10711-s001.pdf [file JCMM-25-10711-s001.pdf]
